# Supplementary material for: Total synthesis of (−)-kainic acid and (+)-allo-kainic acid through SmI2-mediated intramolecular coupling between allyl chloride and an α,β-unsaturated ester
Source: Royal Society of Chemistry journal article supplement (doi:10.1039/c7ob01427a), 2017-01-01

## Supplementary Information

### Total Synthesis of (–)-Kainic Acid and (+)-*allo*-Kainic Acid through SmI<sub>2</sub>-Mediated Intramolecular Coupling between Allyl Chloride and an $\alpha,\beta$ -Unsaturated Ester

Junya Suzuki, Natsumi Miyano, Shunpei Yashiro,

Taiki Umezawa\*, Fuyuhiko Matsuda\*

Graduate School of Environmental Science, Hokkaido University,

N10W5 Sapporo 060-0810, Japan

#### Table of Contents

|                                                      |    |
|------------------------------------------------------|----|
| Determination of geometry of allyl chloride          |    |
| NOESY Spectrum of <b>9</b>                           | S2 |
| NOESY Spectrum of <i>E</i> - <b>14</b>               | S3 |
| Determination of relative configuration of <b>17</b> | S4 |
| Determination of relative configuration of <b>18</b> | S5 |
| NMR Spectra                                          | S6 |

# Determination of geometry of allyl chloride

## NOESY Spectrum of **9**

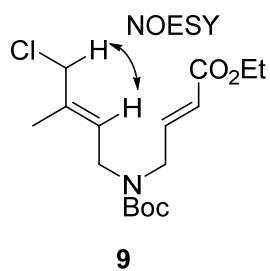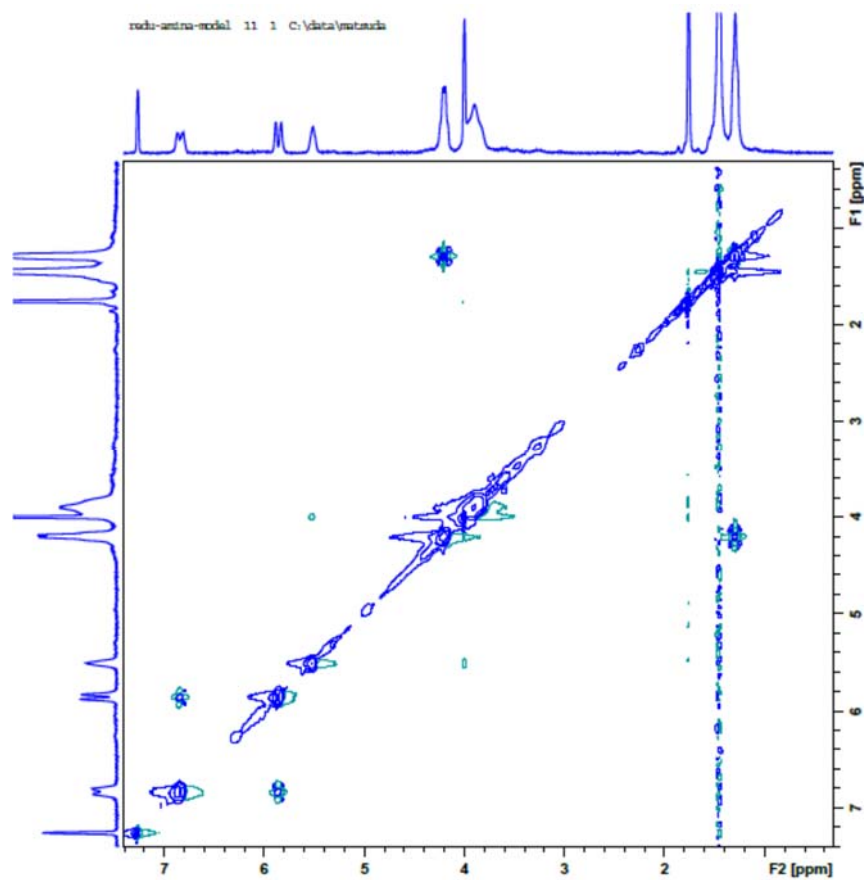

NOESY Spectrum of *E-14*

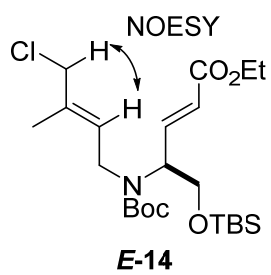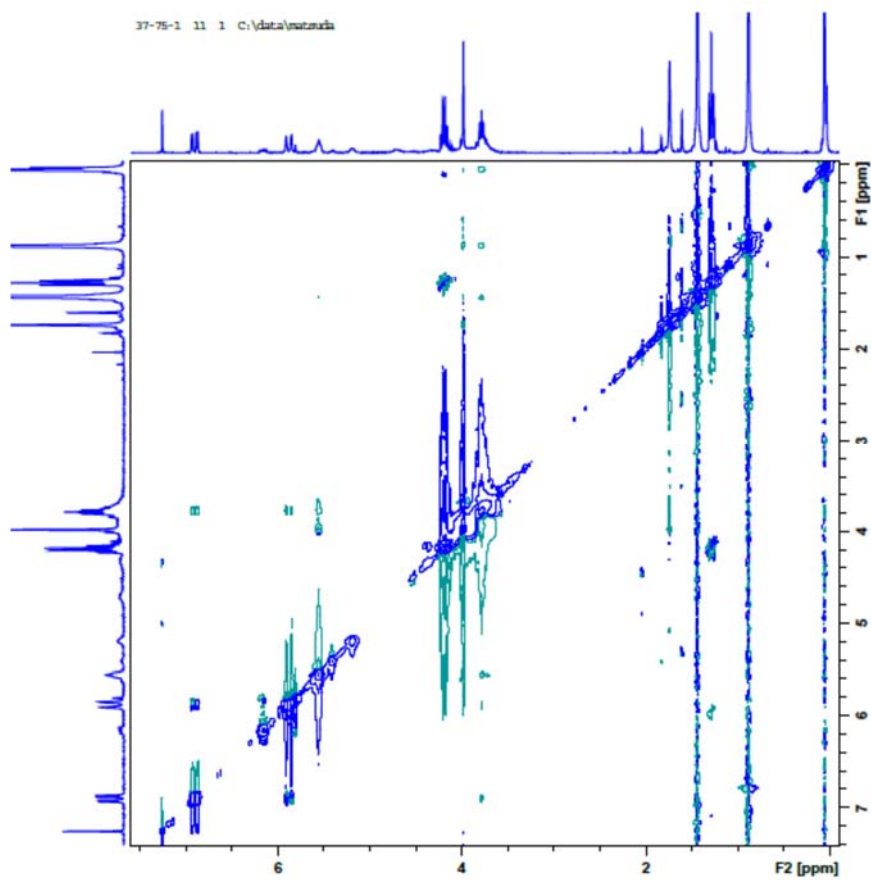

Determination of relative configuration of 17

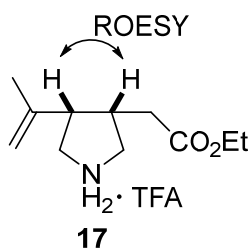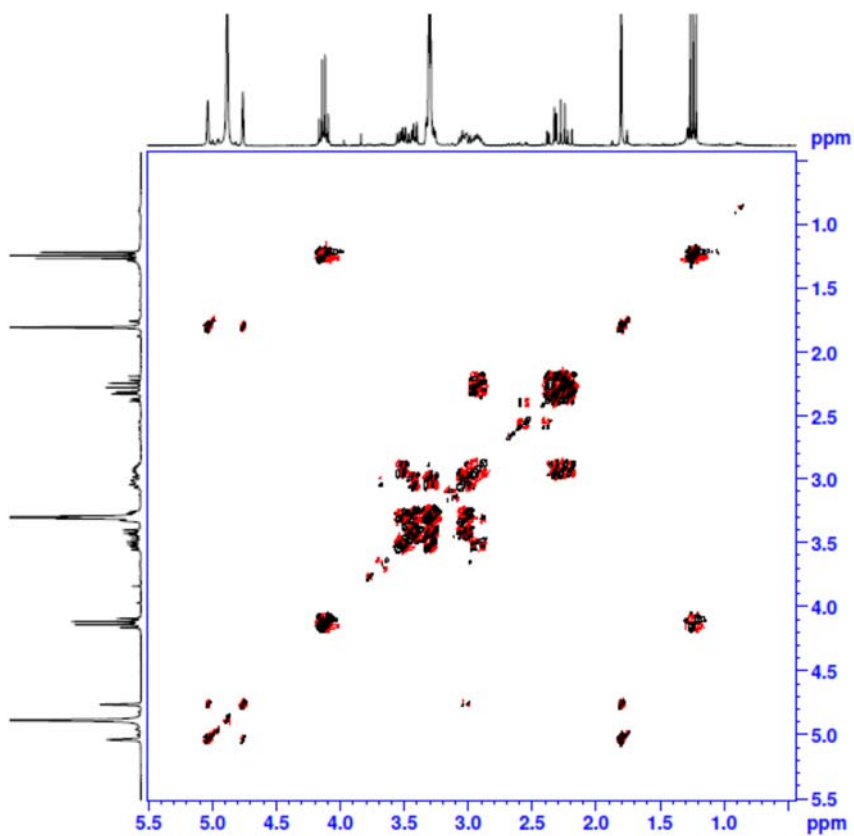

COSY Spectrum

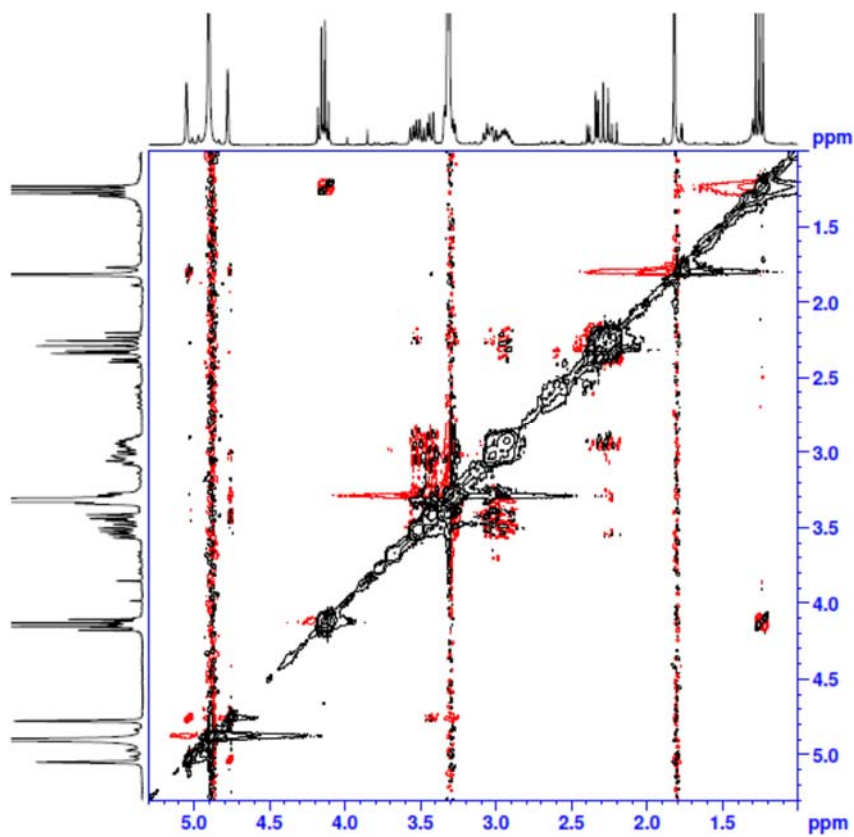

ROESY Spectrum

Determination of relative configuration of **18**

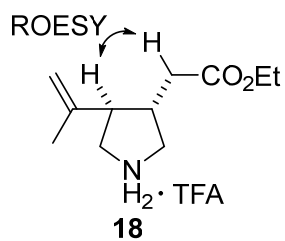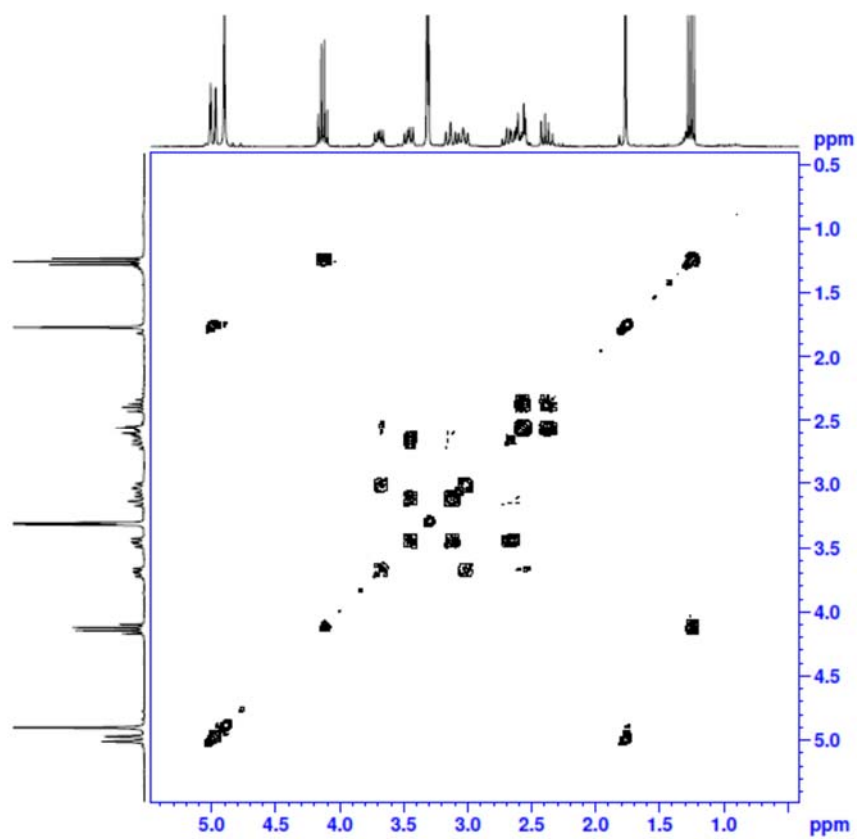

COSY Spectrum

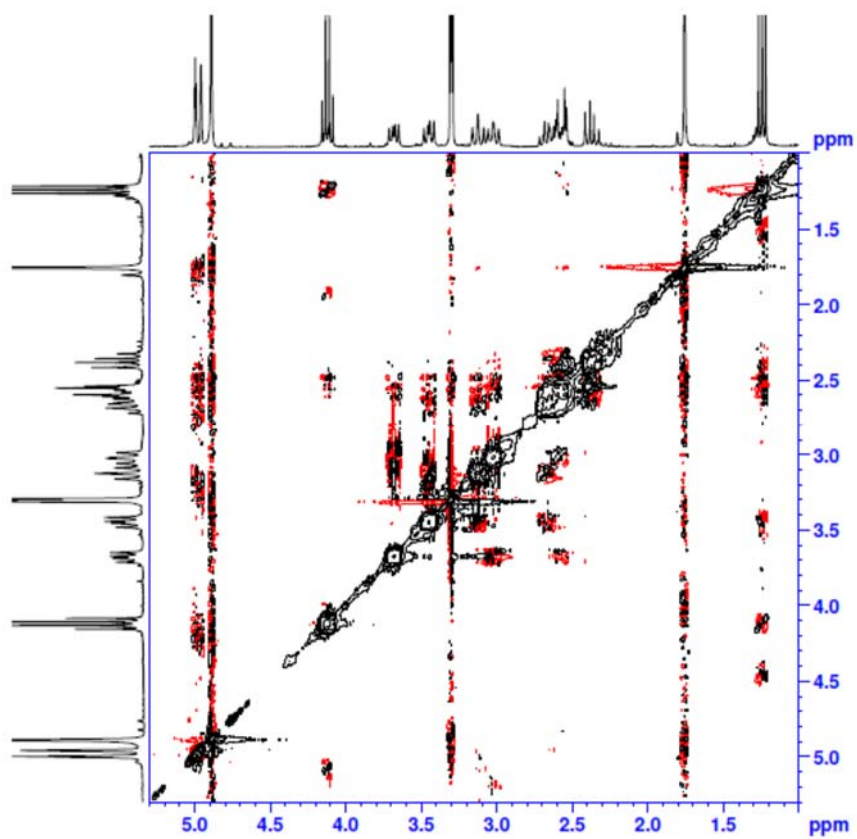

ROESY Spectrum

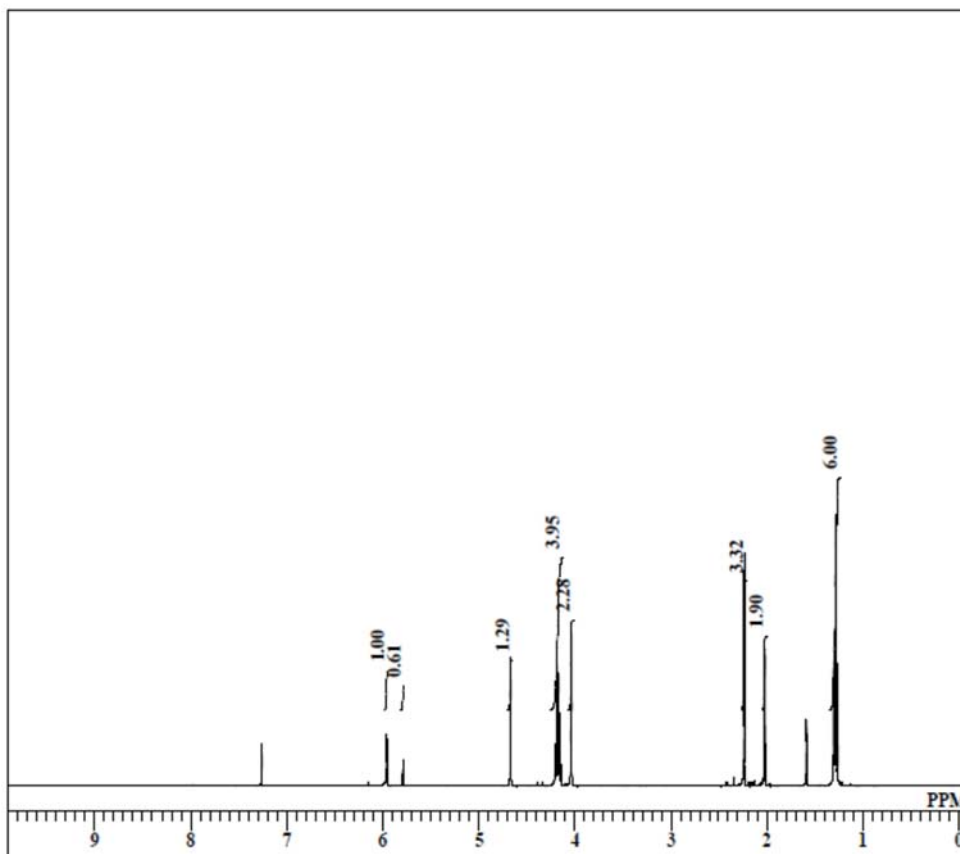

DFILE 72.als  
 COMNT  
 DATIM Sat Sep 12 18:23:22 2015  
 OBNUC 1H  
 EXMOD NON  
 OBFREQ 399.65 MHz  
 OBSSET 124.00 kHz  
 OBFIN 10500.00 Hz  
 POINT 16384  
 FREQU 7992.01 Hz  
 SCANS 8  
 ACQTM 2.0500 sec  
 PD 4.9500 sec  
 PWI 6.10 usec  
 IRNUC 1H  
 CTEMP 23.2 c  
 SLVNT CDCL3  
 EXREF 7.26 ppm  
 BF 0.10 Hz  
 RGAIN 19

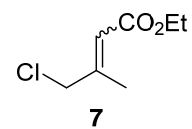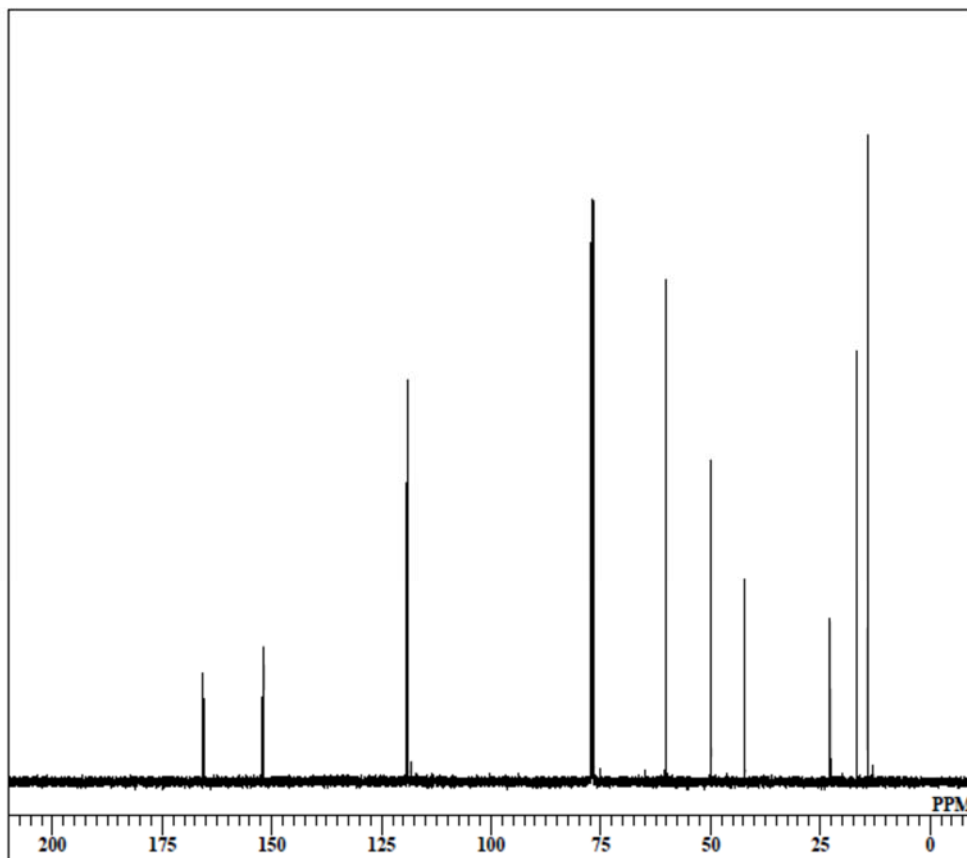

DFILE DEFAULT.ALS  
 COMNT HWE-C  
 DATIM Thu Oct 27 08:11:38 2016  
 OBNUC 13C  
 EXMOD BCM  
 OBFREQ 100.40 MHz  
 OBSSET 125.00 kHz  
 OBFIN 10500.00 Hz  
 POINT 32768  
 FREQU 27118.64 Hz  
 SCANS 1711  
 ACQTM 1.2083 sec  
 PD 1.7920 sec  
 PWI 4.40 usec  
 IRNUC 1H  
 CTEMP 22.5 c  
 SLVNT CDCL3  
 EXREF 77.00 ppm  
 BF 0.10 Hz  
 RGAIN 31

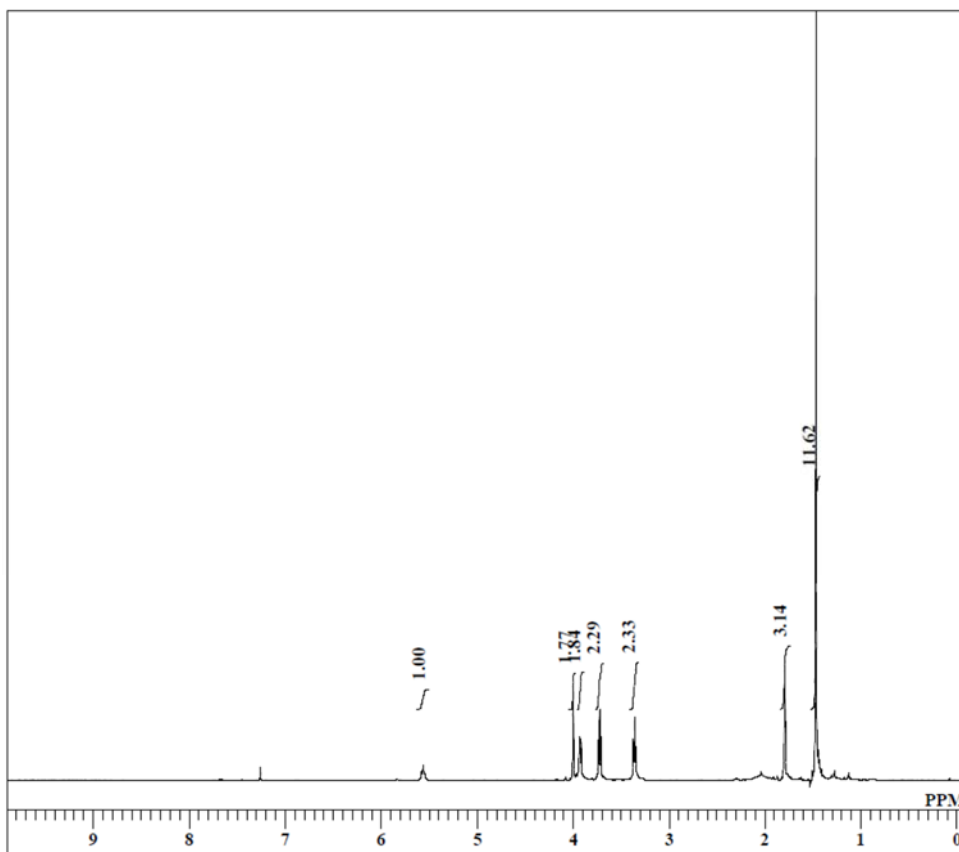

DFILE reductive amination-model.als  
 COMNT reductive amination  
 DATIM Wed May 31 06:22:20 2017  
 OBNUC 1H  
 EXMOD NON  
 OBFRQ 399.65 MHz  
 OBSET 134.40 KHz  
 OBFIN 64.90 Hz  
 POINT 16384  
 FREQU 7992.01 Hz  
 SCANS 8  
 ACQTM 2.0500 sec  
 PD 4.9500 sec  
 PW1 12.10 usec  
 IRNUC 1H  
 CTEMP 69.1 c  
 SLVNT CDCL3  
 EXREF 7.26 ppm  
 BF 0.12 Hz  
 RGAIN 14

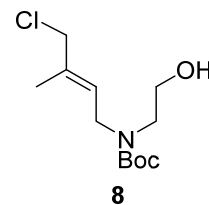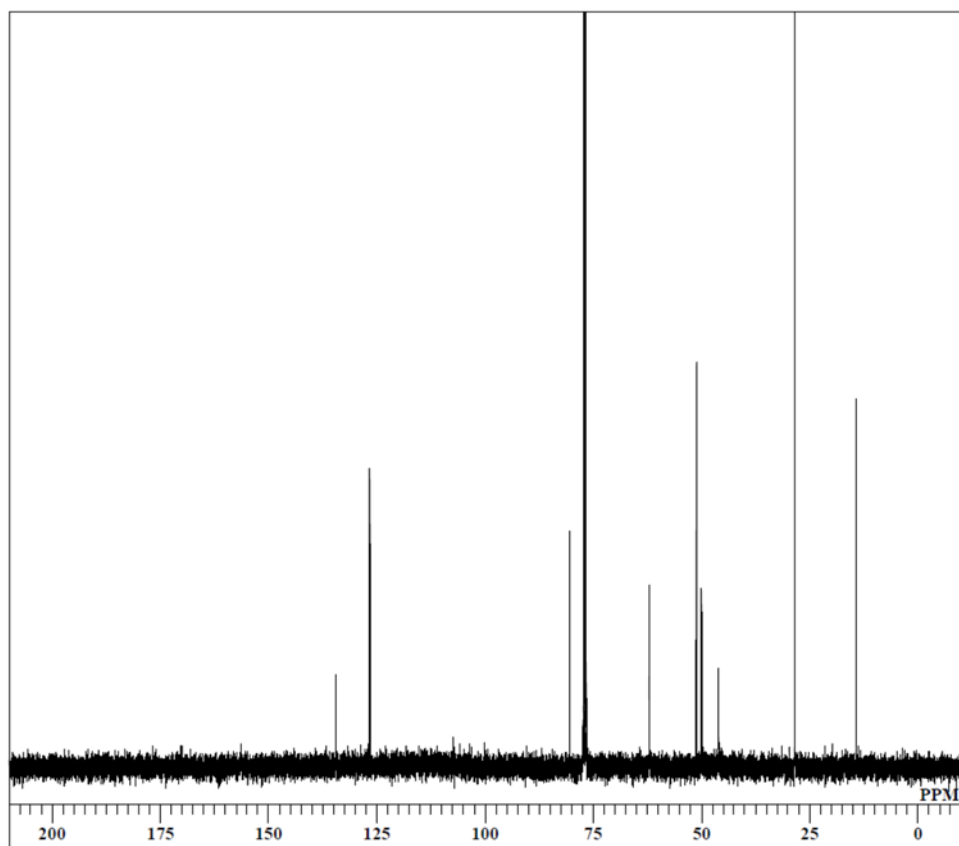

DFILE reductive amination-model-C.  
 COMNT reductive amination  
 DATIM Wed May 31 08:18:51 2017  
 OBNUC 13C  
 EXMOD BCM  
 OBFRQ 100.40 MHz  
 OBSET 125.00 KHz  
 OBFIN 10500.00 Hz  
 POINT 32768  
 FREQU 27118.64 Hz  
 SCANS 2285  
 ACQTM 1.2083 sec  
 PD 1.7920 sec  
 PW1 4.40 usec  
 IRNUC 1H  
 CTEMP 69.1 c  
 SLVNT CDCL3  
 EXREF 77.00 ppm  
 BF 0.12 Hz  
 RGAIN 31

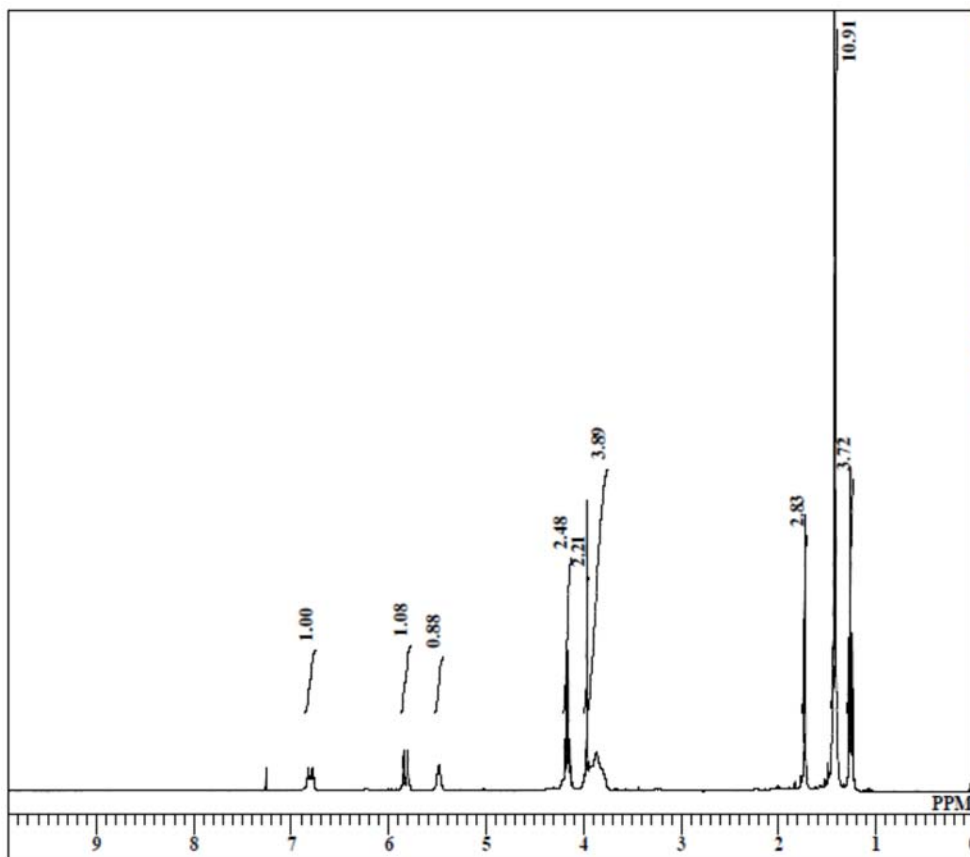

DFILE model precursor.als  
 COMNT model precursor  
 DATIM Sun Oct 09 16:21:47 2016  
 OBNUC 1H  
 EXMOD NON  
 OBFRQ 399.65 MHz  
 OBSET 134.40 KHz  
 OBFIN 64.90 Hz  
 POINT 16384  
 FREQU 7992.01 Hz  
 SCANS 8  
 ACQTM 2.0500 sec  
 PD 4.9500 sec  
 PW1 12.10 usec  
 IRNUC 1H  
 CTEMP 22.7 c  
 SLVNT CDCL3  
 EXREF 7.26 ppm  
 BF 0.10 Hz  
 RGAIN 11

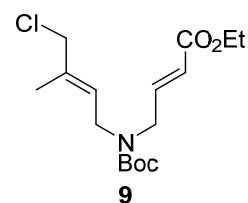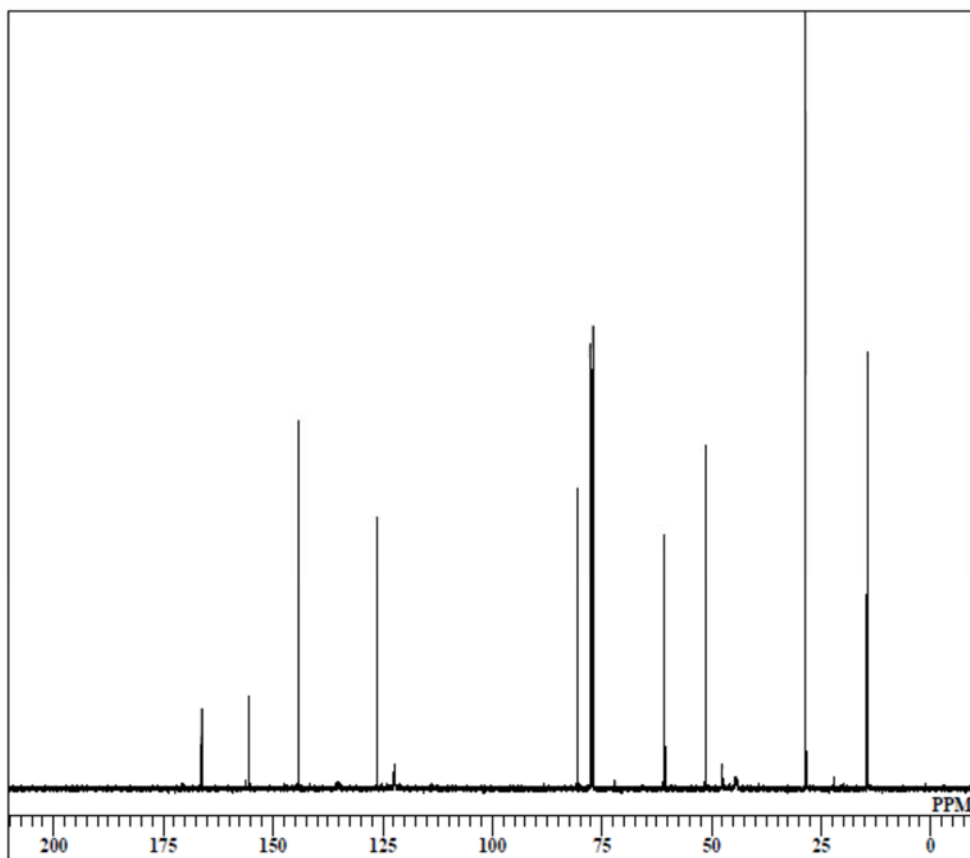

DFILE model precursor 13C.als  
 COMNT model precursor  
 DATIM Sun Oct 09 18:58:45 2016  
 OBNUC 13C  
 EXMOD BCM  
 OBFRQ 100.40 MHz  
 OBSET 125.00 KHz  
 OBFIN 10500.00 Hz  
 POINT 32768  
 FREQU 27118.64 Hz  
 SCANS 3000  
 ACQTM 1.2083 sec  
 PD 1.7920 sec  
 PW1 4.40 usec  
 IRNUC 1H  
 CTEMP 22.6 c  
 SLVNT CDCL3  
 EXREF 77.00 ppm  
 BF 0.10 Hz  
 RGAIN 31



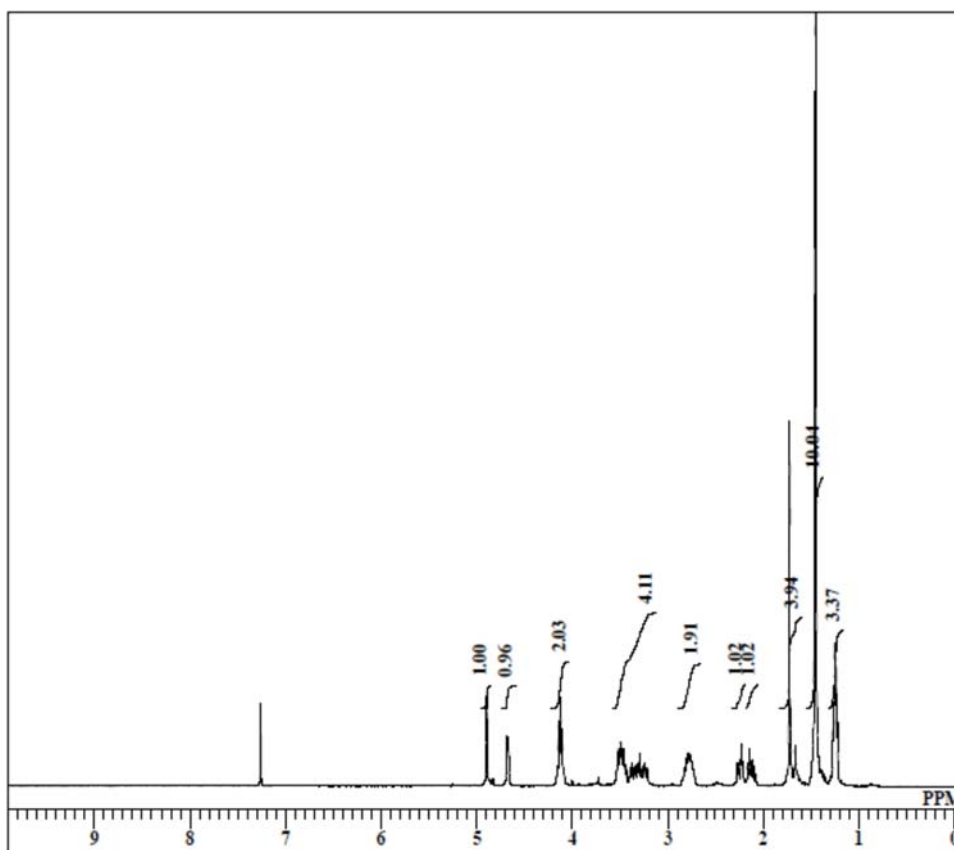

DFILE 39-22-5.als  
 COMNT 39-22-5  
 DATIM Mon Oct 03 09:10:28 2016  
 OBNUC 1H  
 EXMOD NON  
 OBFREQ 399.65 MHz  
 OBSET 134.40 KHz  
 OBFIN 64.90 Hz  
 POINT 16384  
 FREQU 7992.01 Hz  
 SCANS 4  
 ACQTM 2.0500 sec  
 PD 4.9500 sec  
 PWI 12.10 usec  
 IRNUC 1H  
 CTEMP 22.9 c  
 SLVNT CDCL3  
 EXREF 7.26 ppm  
 BF 0.10 Hz  
 RGAIN 15

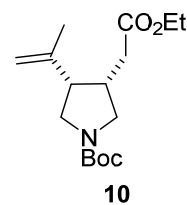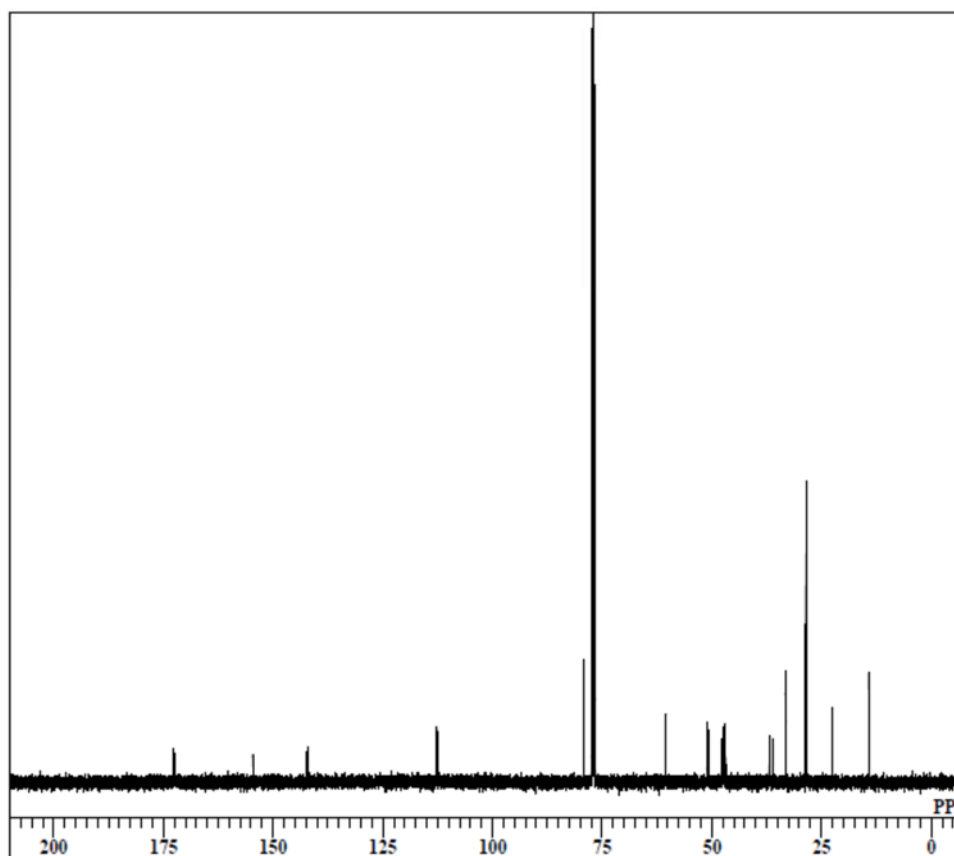

DFILE 39-22-5-C.als  
 COMNT 39-22-5-C  
 DATIM Tue Oct 04 08:33:54 2016  
 OBNUC 13C  
 EXMOD BCM  
 OBFREQ 100.40 MHz  
 OBSET 125.00 KHz  
 OBFIN 10500.00 Hz  
 POINT 32768  
 FREQU 27118.64 Hz  
 SCANS 2221  
 ACQTM 1.2083 sec  
 PD 1.7920 sec  
 PWI 4.40 usec  
 IRNUC 1H  
 CTEMP 23.0 c  
 SLVNT CDCL3  
 EXREF 77.00 ppm  
 BF 0.10 Hz  
 RGAIN 31

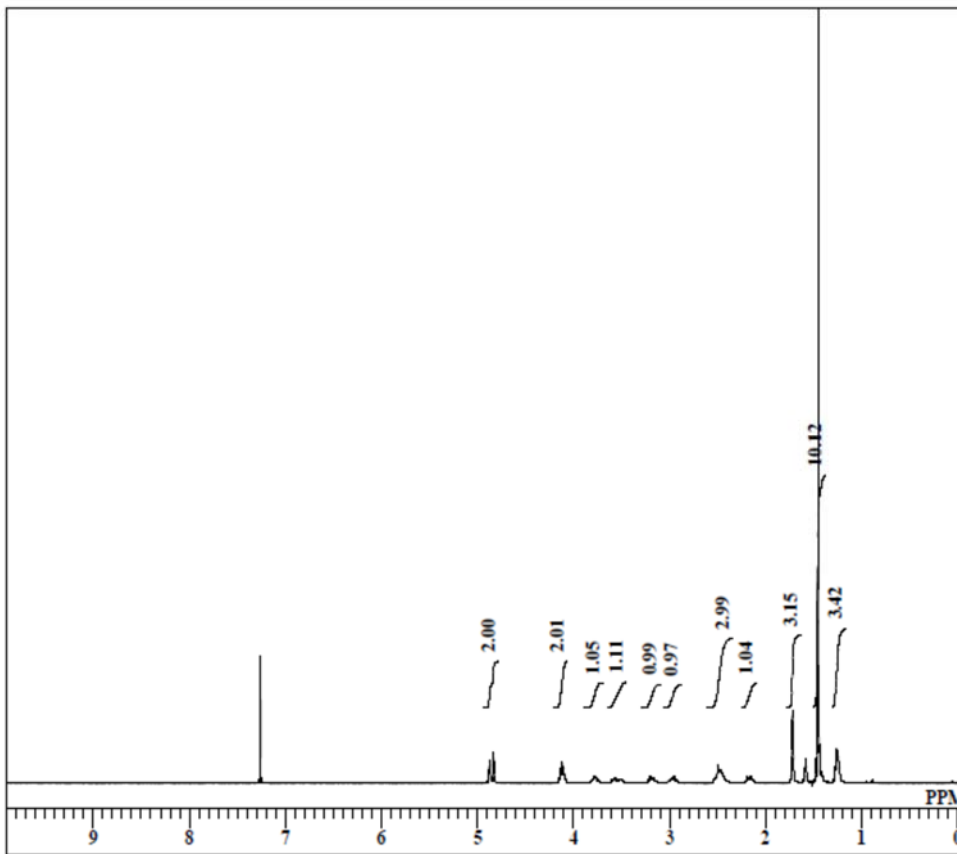

DFILE 39-22-1.als  
 COMNT 38-22-1  
 DATIM Sun Oct 02 09:32:46 2016  
 OBNUC 1H  
 EXMOD NON  
 OBFRQ 399.65 MHz  
 OBSET 134.40 KHz  
 OBFIN 64.90 Hz  
 POINT 16384  
 FREQU 7992.01 Hz  
 SCANS 4  
 ACQTM 2.0500 sec  
 PD 4.9500 sec  
 PWI 12.10 usec  
 IRNUC 1H  
 CTEMP 22.8 c  
 SLVNT CDCL3  
 EXREF 7.26 ppm  
 BF 0.10 Hz  
 RGAIN 20

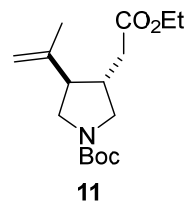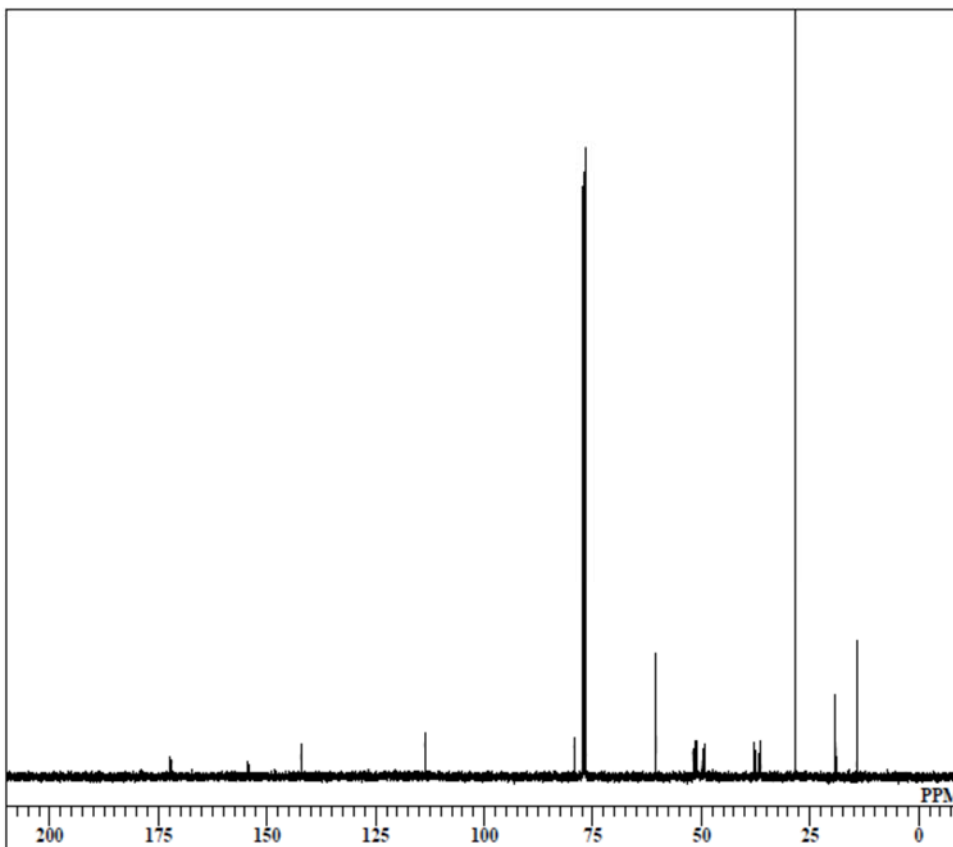

DFILE 39-22-1-C.als  
 COMNT 39-22-1-C  
 DATIM Wed Oct 05 08:28:01 2016  
 OBNUC 13C  
 EXMOD BCM  
 OBFRQ 100.40 MHz  
 OBSET 125.00 KHz  
 OBFIN 10500.00 Hz  
 POINT 32768  
 FREQU 27118.64 Hz  
 SCANS 2270  
 ACQTM 1.2083 sec  
 PD 1.7920 sec  
 PWI 4.40 usec  
 IRNUC 1H  
 CTEMP 22.7 c  
 SLVNT CDCL3  
 EXREF 77.00 ppm  
 BF 0.10 Hz  
 RGAIN 31

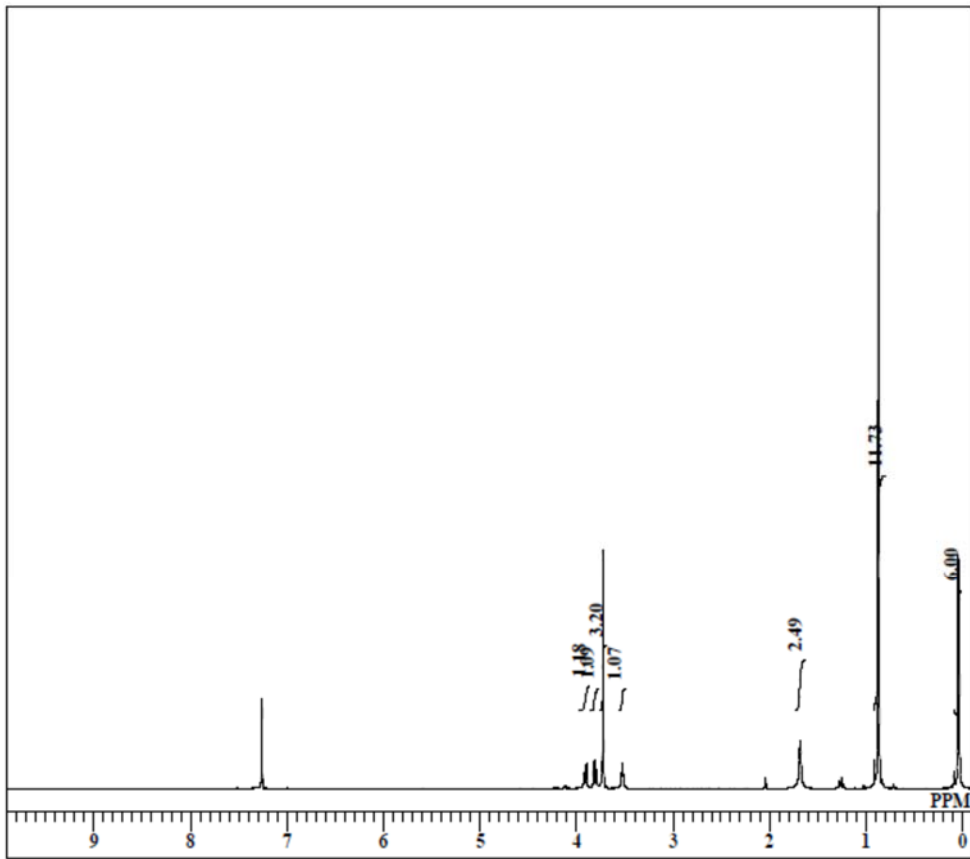

DFILE 74.als  
 COMNT Ex823-1  
 DATIM Tue Oct 13 16:16:28 2015  
 OBNUC 1H  
 EXMOD NON  
 OBFREQ 399.65 MHz  
 OBSET 134.40 KHz  
 OBFIN 64.90 Hz  
 POINT 16384  
 FREQU 7992.01 Hz  
 SCANS 8  
 ACQTM 2.0500 sec  
 PD 4.9500 sec  
 PWI 12.10 usec  
 IRNUC 1H  
 CTEMP 22.4 c  
 SLVNT CDCL3  
 EXREF 7.26 ppm  
 BF 0.10 Hz  
 RGAIN 18

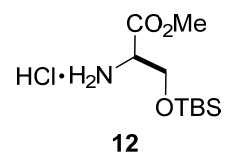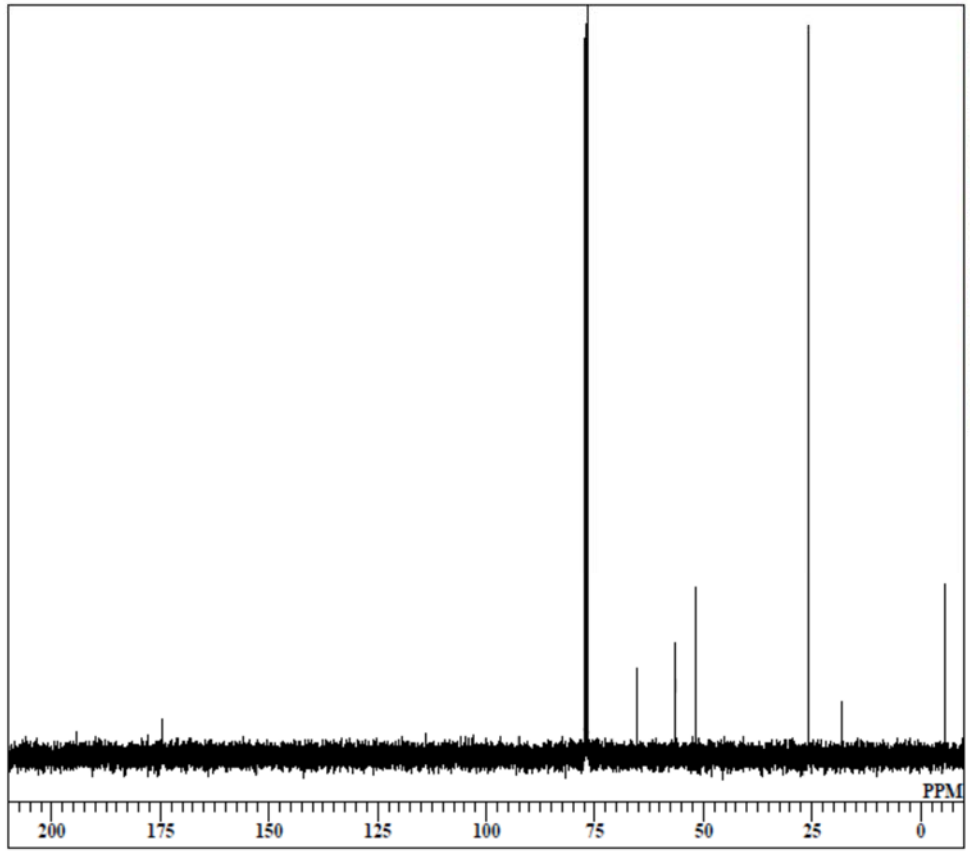

DFILE 74-C.als  
 COMNT Ex823  
 DATIM Thu Dec 10 08:30:50 2015  
 OBNUC 13C  
 EXMOD BCM  
 OBFREQ 100.40 MHz  
 OBSET 125.00 KHz  
 OBFIN 10500.00 Hz  
 POINT 32768  
 FREQU 27118.64 Hz  
 SCANS 360  
 ACQTM 1.2083 sec  
 PD 1.7920 sec  
 PWI 4.40 usec  
 IRNUC 1H  
 CTEMP 23.4 c  
 SLVNT CDCL3  
 EXREF 77.00 ppm  
 BF 0.10 Hz  
 RGAIN 31

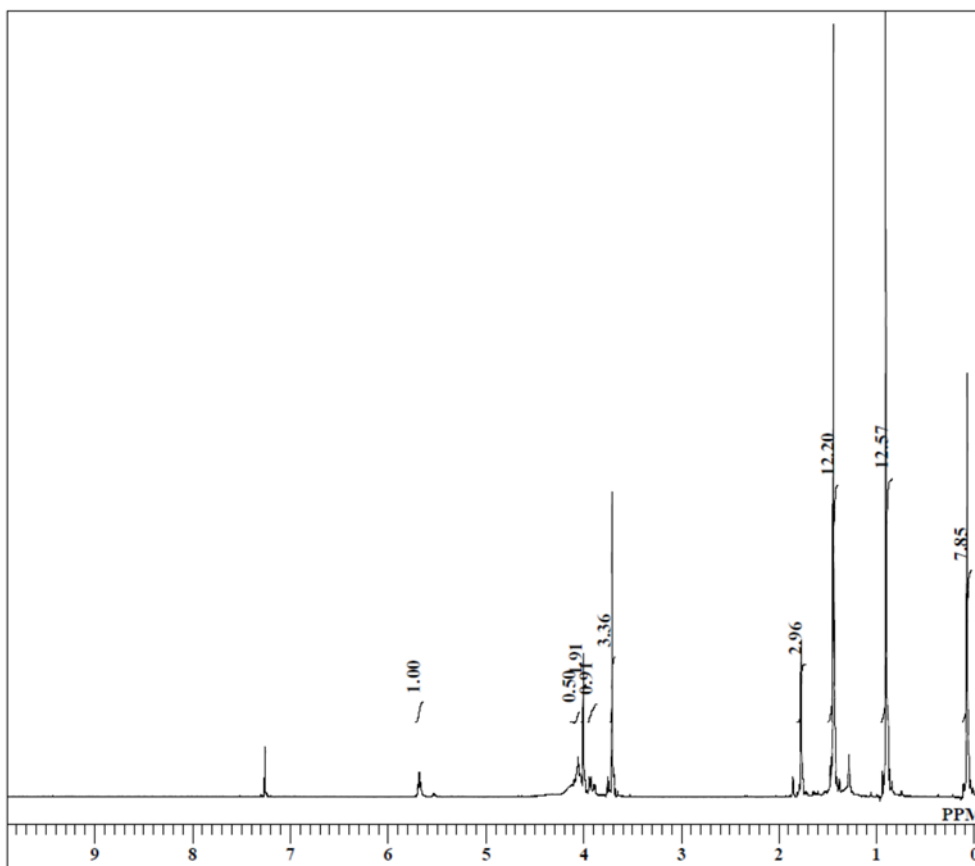

DFILE reductive amination-real.a  
 COMNT reductive amination-real  
 DATIM Mon Jun 05 07:07:03 2017  
 OBNUC 1H  
 EXMOD NON  
 OBFRQ 399.65 MHz  
 OBSET 124.00 KHz  
 OBFIN 10500.00 Hz  
 POINT 16384  
 FREQU 7992.01 Hz  
 SCANS 4  
 ACQTM 2.0500 sec  
 PD 4.9500 sec  
 PW1 6.60 usec  
 IRNUC 1H  
 CTEMP 69.1 c  
 SLVNT CDCL3  
 EXREF 7.26 ppm  
 BF 0.12 Hz  
 RGAIN 18

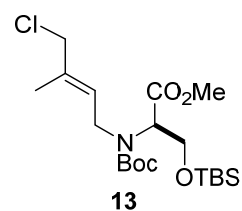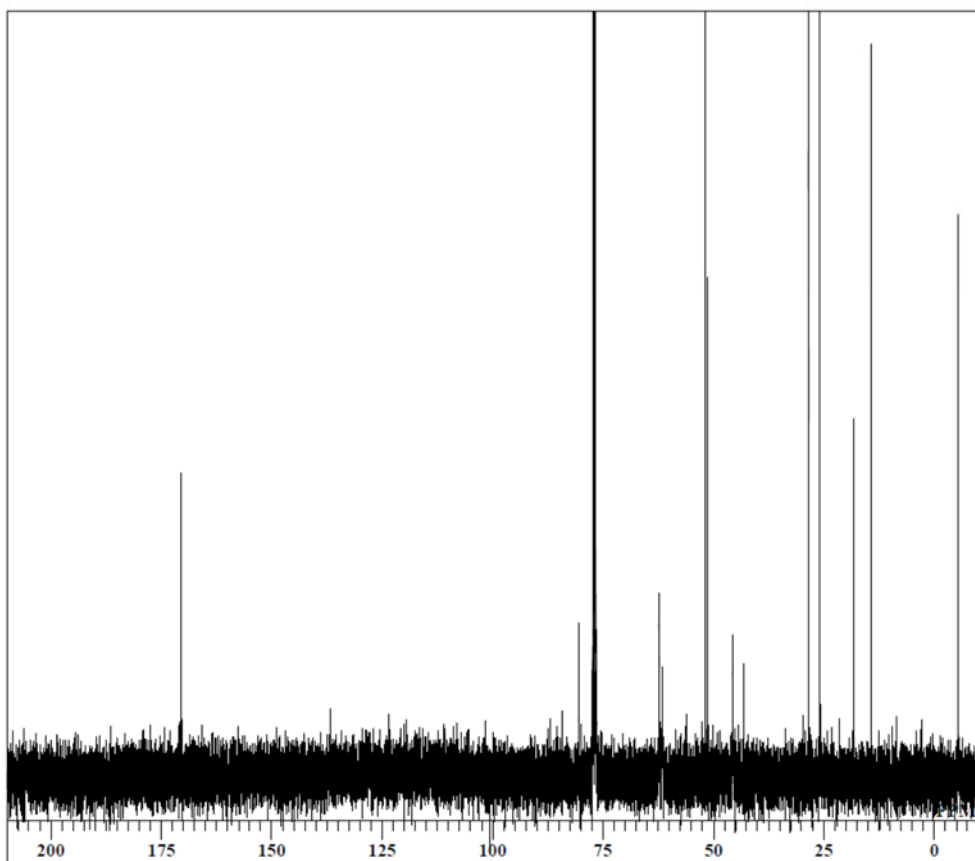

DFILE reductive amination-real-C  
 COMNT reductive amination-real-C  
 DATIM Mon Jun 05 08:56:34 2017  
 OBNUC 13C  
 EXMOD BCM  
 OBFRQ 100.40 MHz  
 OBSET 125.00 KHz  
 OBFIN 10500.00 Hz  
 POINT 32768  
 FREQU 27118.64 Hz  
 SCANS 2150  
 ACQTM 1.2083 sec  
 PD 1.7920 sec  
 PW1 4.80 usec  
 IRNUC 1H  
 CTEMP 69.1 c  
 SLVNT CDCL3  
 EXREF 77.00 ppm  
 BF 0.12 Hz  
 RGAIN 31

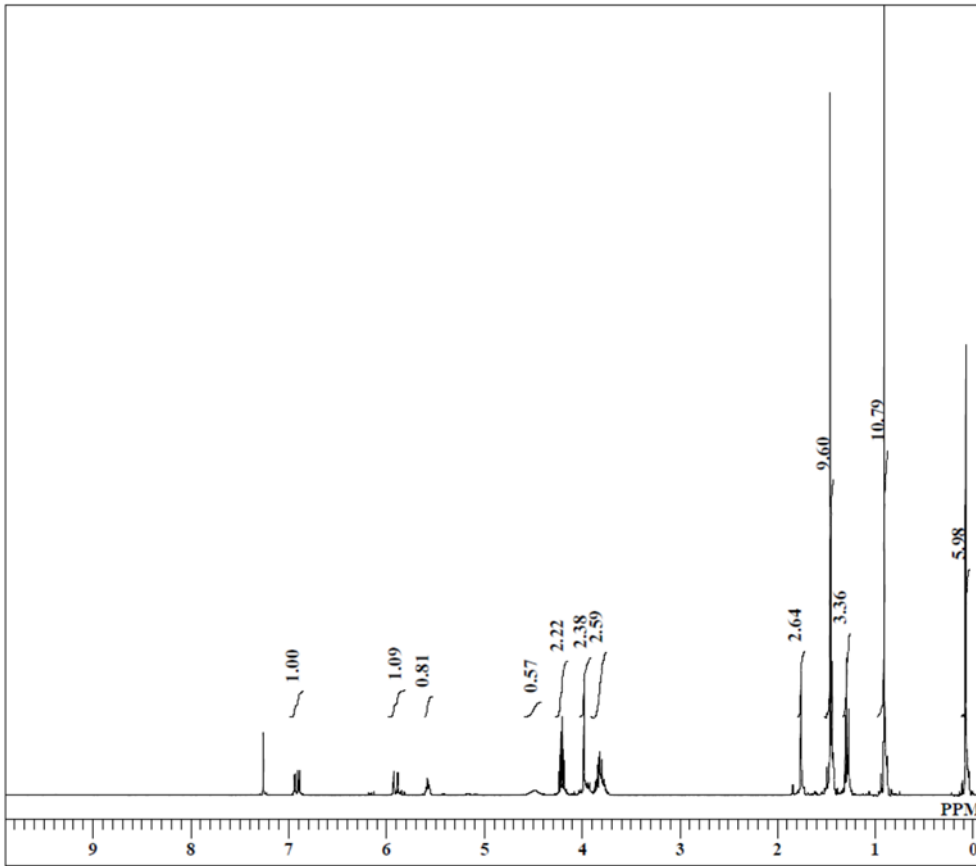

DFILE E-Wittig-pure-70-2.als  
 COMNT E  
 DATIM Tue Jun 06 07:31:53 2017  
 OBNUC 1H  
 EXMOD NON  
 OBFRQ 399.65 MHz  
 OBSET 124.00 KHz  
 OBFIN 10500.00 Hz  
 POINT 16384  
 FREQU 7992.01 Hz  
 SCANS 4  
 ACQTM 2.0500 sec  
 PD 4.9500 sec  
 PW1 6.60 usec  
 IRNUC 1H  
 CTEMP 69.1 c  
 SLVNT CDCL3  
 EXREF 7.26 ppm  
 BF 0.12 Hz  
 RGAIN 18

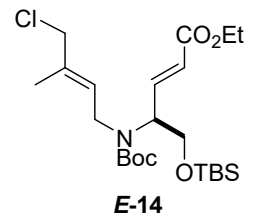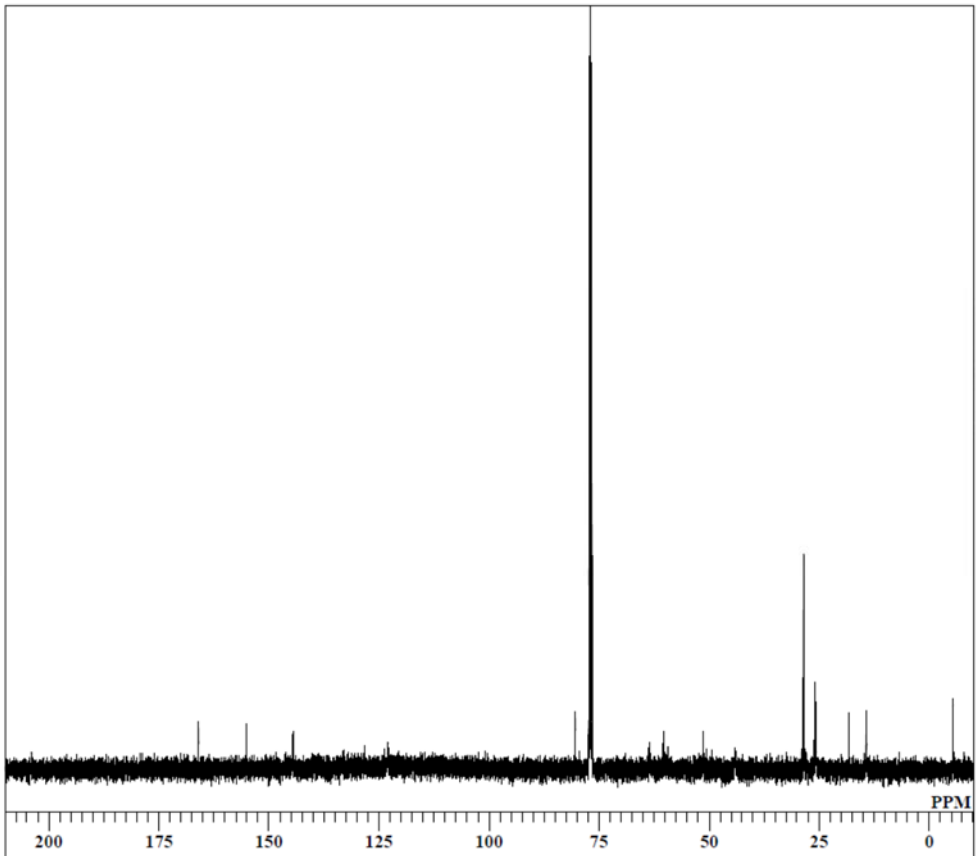

DFILE E-Wittig-HPLC-70-C.als  
 COMNT E-HPLC-70  
 DATIM Thu May 04 11:04:38 2017  
 OBNUC 13C  
 EXMOD BCM  
 OBFRQ 100.40 MHz  
 OBSET 125.00 KHz  
 OBFIN 10500.00 Hz  
 POINT 32768  
 FREQU 27118.64 Hz  
 SCANS 4844  
 ACQTM 1.2083 sec  
 PD 1.7920 sec  
 PW1 4.40 usec  
 IRNUC 1H  
 CTEMP 69.1 c  
 SLVNT CDCL3  
 EXREF 77.00 ppm  
 BF 0.10 Hz  
 RGAIN 31

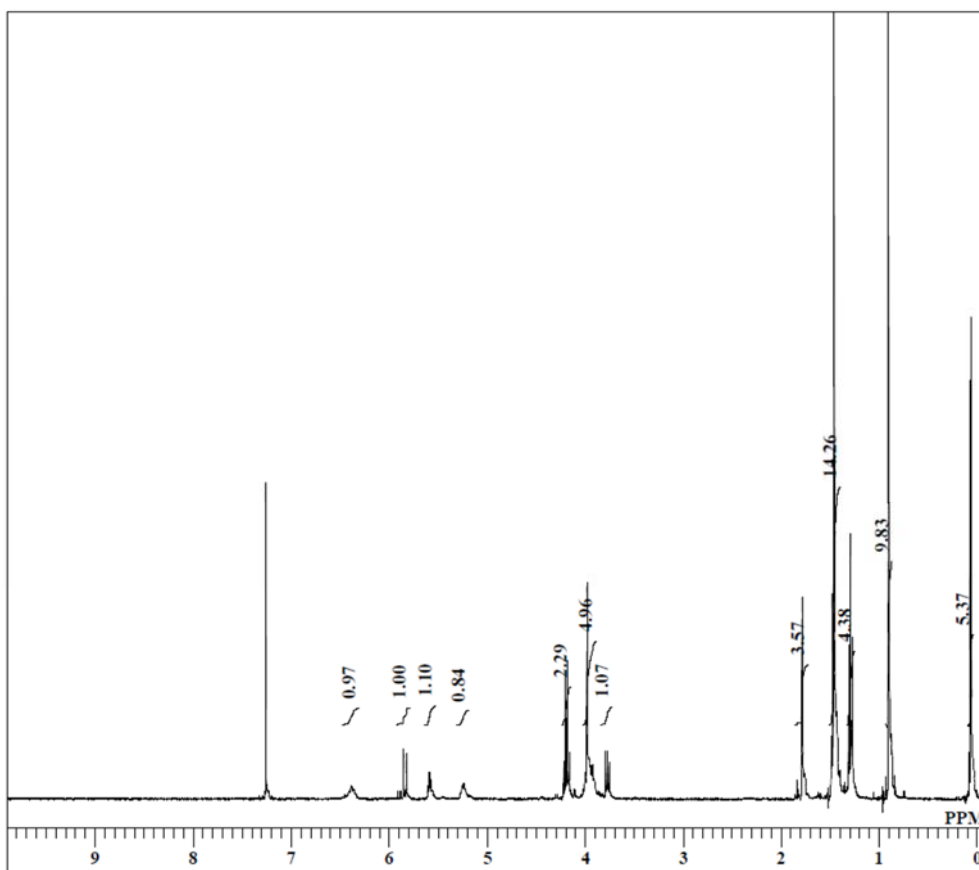

DFILE Z-wittig-pure-70-2.als  
 COMNT Z  
 DATIM Tue Jun 06 07:38:27 2017  
 OBNUC 1H  
 EXMOD NON  
 OBFRQ 399.65 MHz  
 OBSET 124.00 KHz  
 OBFIN 10500.00 Hz  
 POINT 16384  
 FREQU 7992.01 Hz  
 SCANS 4  
 ACQTM 2.0500 sec  
 PD 4.9500 sec  
 PW1 6.60 usec  
 IRNUC 1H  
 CTEMP 69.2 c  
 SLVNT CDCL3  
 EXREF 7.26 ppm  
 BF 0.12 Hz  
 RGAIN 21

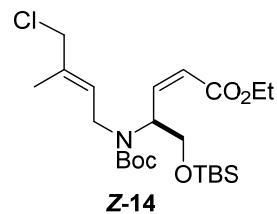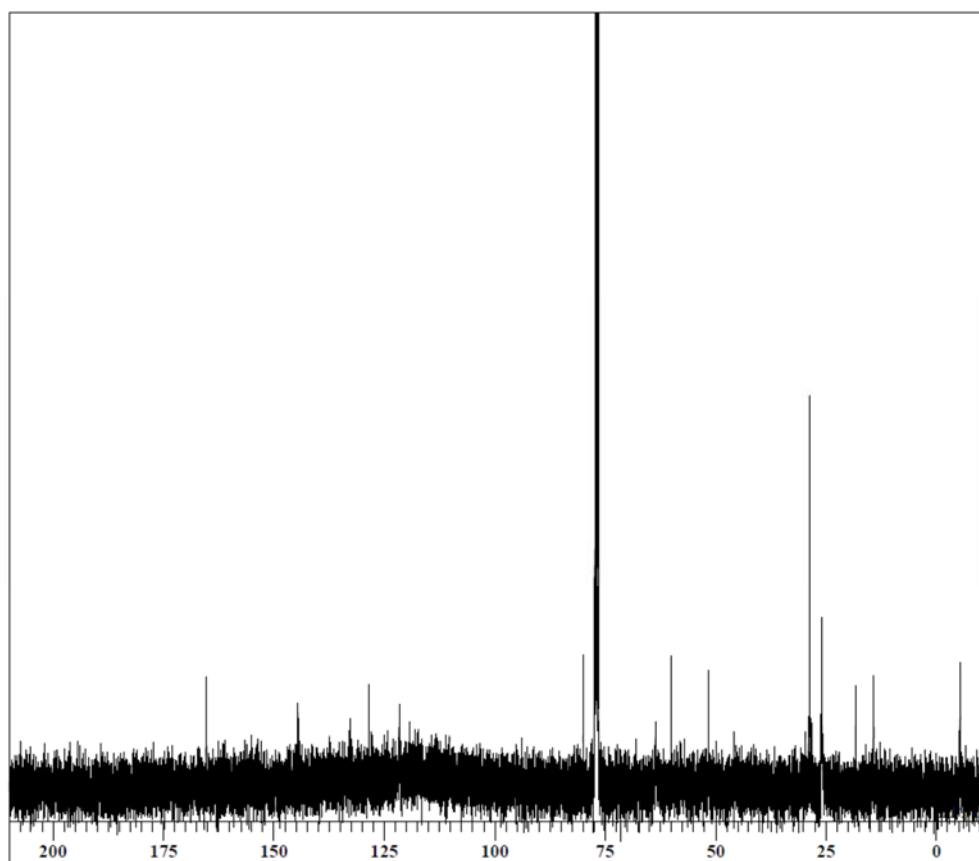

DFILE Z-wittig-HPLC-70-C.als  
 COMNT Z-HPLC-70  
 DATIM Thu May 04 06:53:38 2017  
 OBNUC 13C  
 EXMOD BCM  
 OBFRQ 100.40 MHz  
 OBSET 125.00 KHz  
 OBFIN 10500.00 Hz  
 POINT 32768  
 FREQU 27118.64 Hz  
 SCANS 14196  
 ACQTM 1.2083 sec  
 PD 1.7920 sec  
 PW1 4.40 usec  
 IRNUC 1H  
 CTEMP 69.1 c  
 SLVNT CDCL3  
 EXREF 77.00 ppm  
 BF 0.10 Hz  
 RGAIN 31

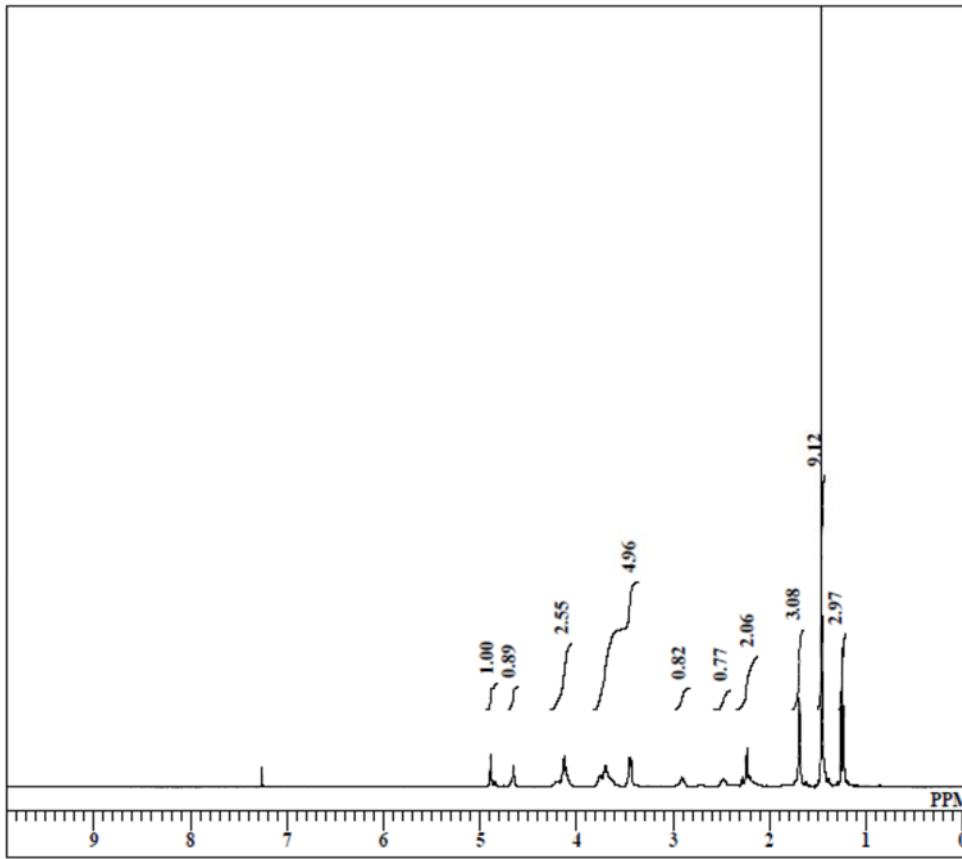

DFILE 39-17-2.als  
 COMNT 39-17-2  
 DATIM Mon Sep 26 09:27:06 2016  
 OBNUC 1H  
 EXMOD NON  
 OBFREQ 399.65 MHz  
 OBSET 134.40 KHz  
 OBFIN 64.90 Hz  
 POINT 16384  
 FREQU 7992.01 Hz  
 SCANS 8  
 ACQTM 2.0500 sec  
 PD 4.9500 sec  
 PWI 12.10 usec  
 IRNUC 1H  
 CTEMP 23.3 c  
 SLVNT CDCL3  
 EXREF 7.26 ppm  
 BF 0.10 Hz  
 RGAIN 14

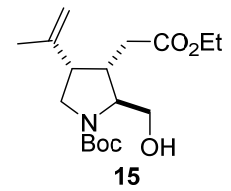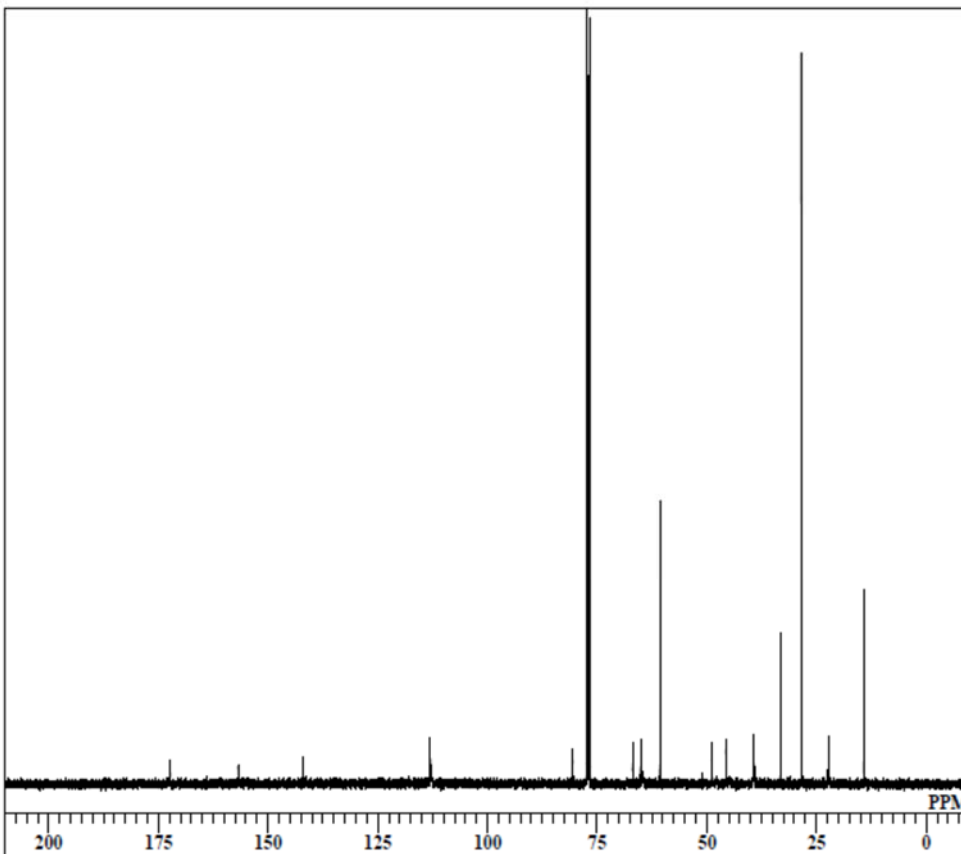

DFILE 39-17-2-C.als  
 COMNT 39-17-2-C  
 DATIM Wed Sep 28 09:04:34 2016  
 OBNUC 13C  
 EXMOD BCM  
 OBFREQ 100.40 MHz  
 OBSET 125.00 KHz  
 OBFIN 10500.00 Hz  
 POINT 32768  
 FREQU 27118.64 Hz  
 SCANS 3000  
 ACQTM 1.2083 sec  
 PD 1.7920 sec  
 PWI 4.40 usec  
 IRNUC 1H  
 CTEMP 22.9 c  
 SLVNT CDCL3  
 EXREF 77.00 ppm  
 BF 0.10 Hz  
 RGAIN 31

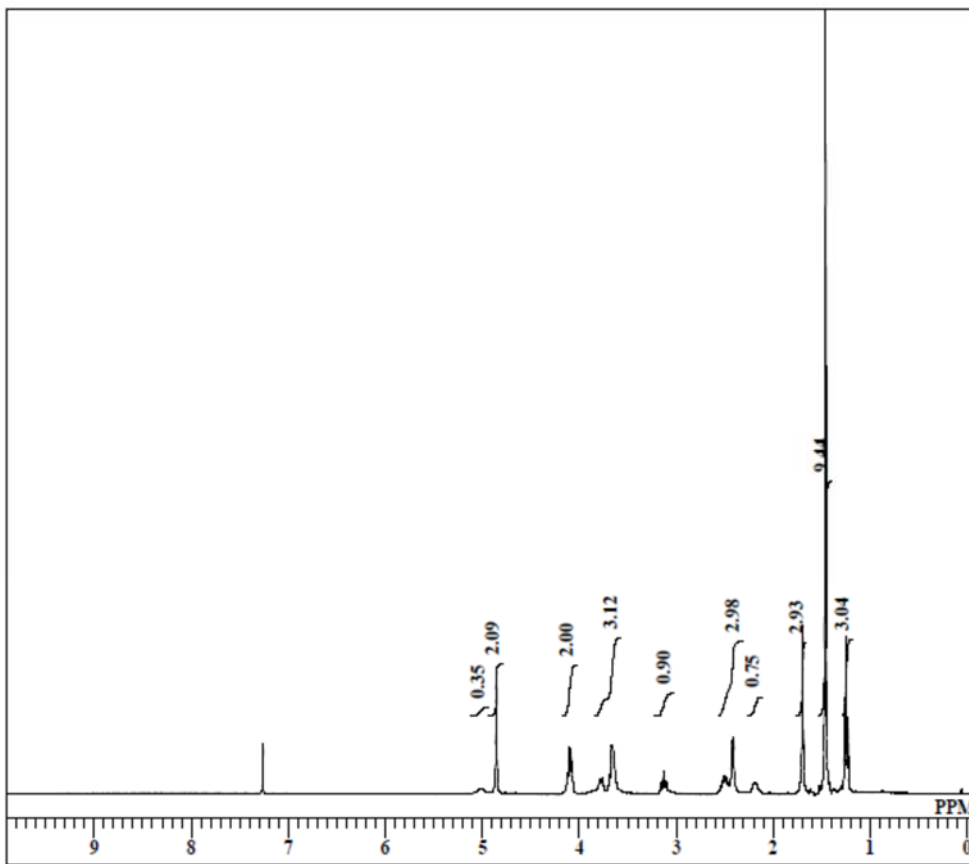

DFILE 36-115-2-H.als  
 COMNT 36-115-2  
 DATIM Sun Jan 17 07:53:18 2016  
 OBNUC 1H  
 EXMOD NON  
 OBFRQ 399.65 MHz  
 OBSET 134.40 KHz  
 OBFIN 64.90 Hz  
 POINT 16384  
 FREQU 7992.01 Hz  
 SCANS 4  
 ACQTM 2.0500 sec  
 PD 4.9500 sec  
 PW1 12.10 usec  
 IRNUC 1H  
 CTEMP 18.9 c  
 SLVNT CDCL3  
 EXREF 7.26 ppm  
 BF 0.10 Hz  
 RGAIN 16

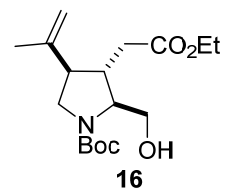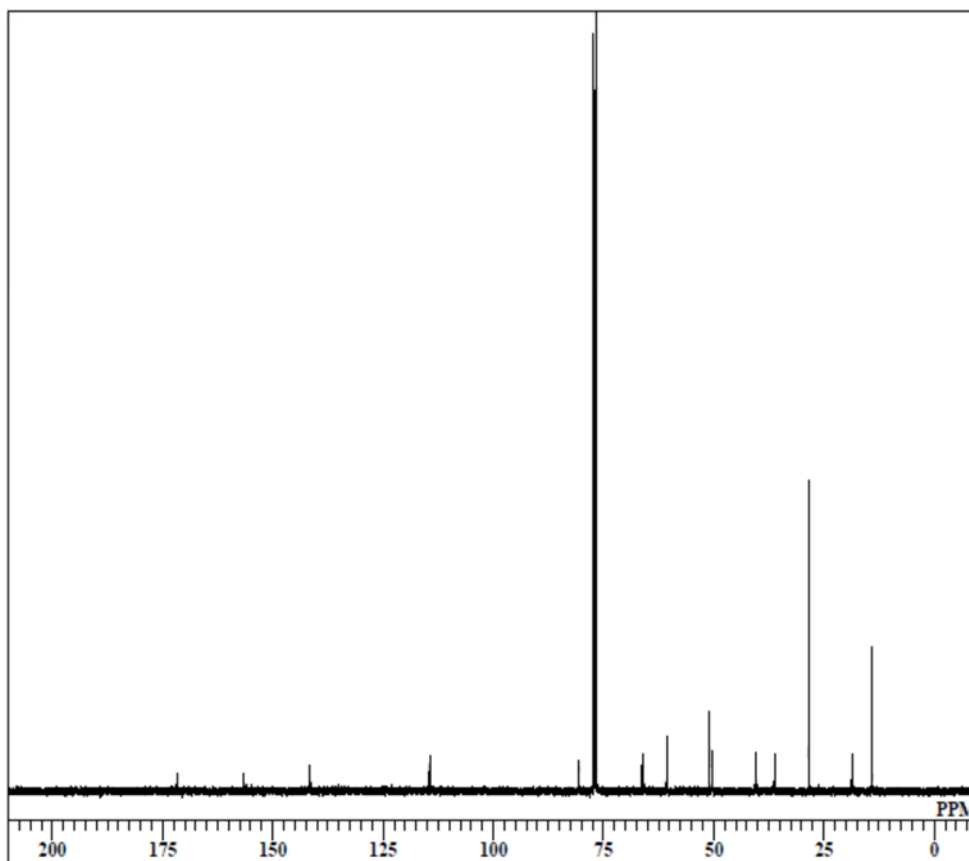

DFILE 36-115-2-C.als  
 COMNT 36-115-2-C  
 DATIM Sun Jan 17 10:50:33 2016  
 OBNUC 13C  
 EXMOD BCM  
 OBFRQ 100.40 MHz  
 OBSET 125.00 KHz  
 OBFIN 10500.00 Hz  
 POINT 32768  
 FREQU 27118.64 Hz  
 SCANS 3506  
 ACQTM 1.2083 sec  
 PD 1.7920 sec  
 PW1 4.40 usec  
 IRNUC 1H  
 CTEMP 18.7 c  
 SLVNT CDCL3  
 EXREF 77.00 ppm  
 BF 0.10 Hz  
 RGAIN 31



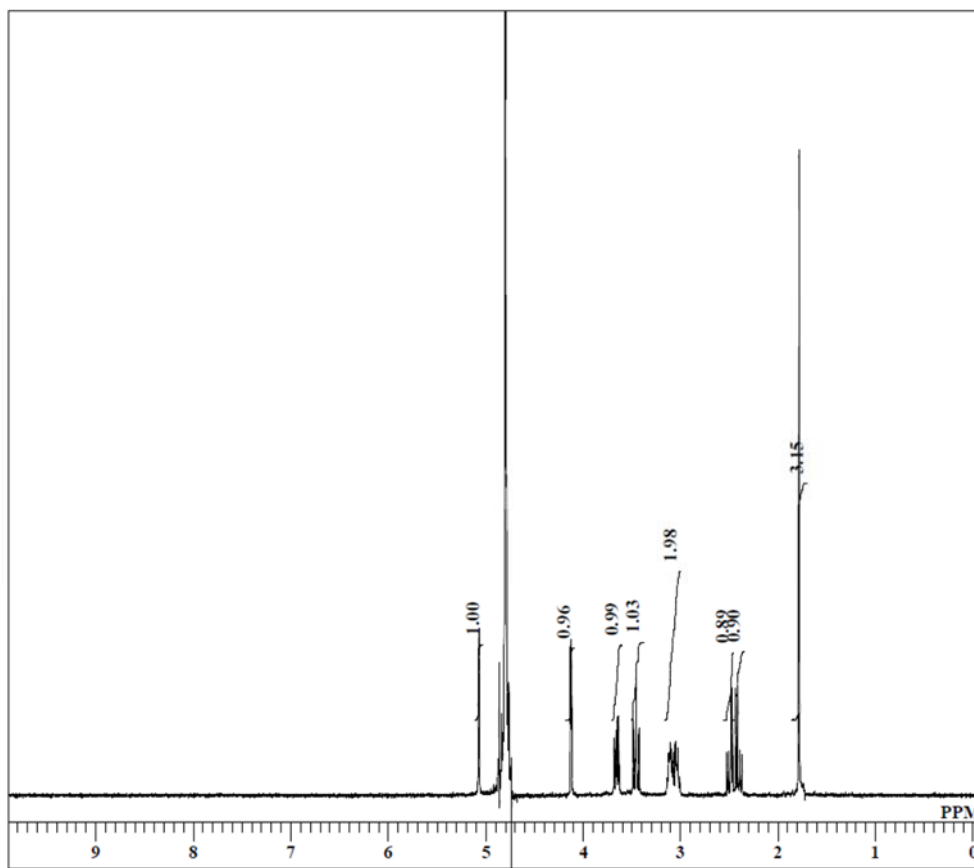

DFILE 41-52-3.als  
 COMNT 41-52-3  
 DATIM Tue Jul 04 07:35:22 2017  
 OBNUC 1H  
 EXMOD NON  
 OBFRQ 399.65 MHz  
 OBSET 124.00 KHz  
 OBFIN 10500.00 Hz  
 POINT 16384  
 FREQU 7992.01 Hz  
 SCANS 16  
 ACQTM 2.0500 sec  
 PD 4.9500 sec  
 PW1 6.60 usec  
 IRNUC 1H  
 CTEMP 23.2 c  
 SLVNT D2O  
 EXREF 4.80 ppm  
 BF 0.10 Hz  
 RGAIN 23

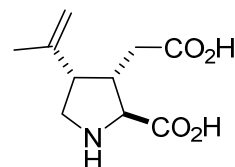

1

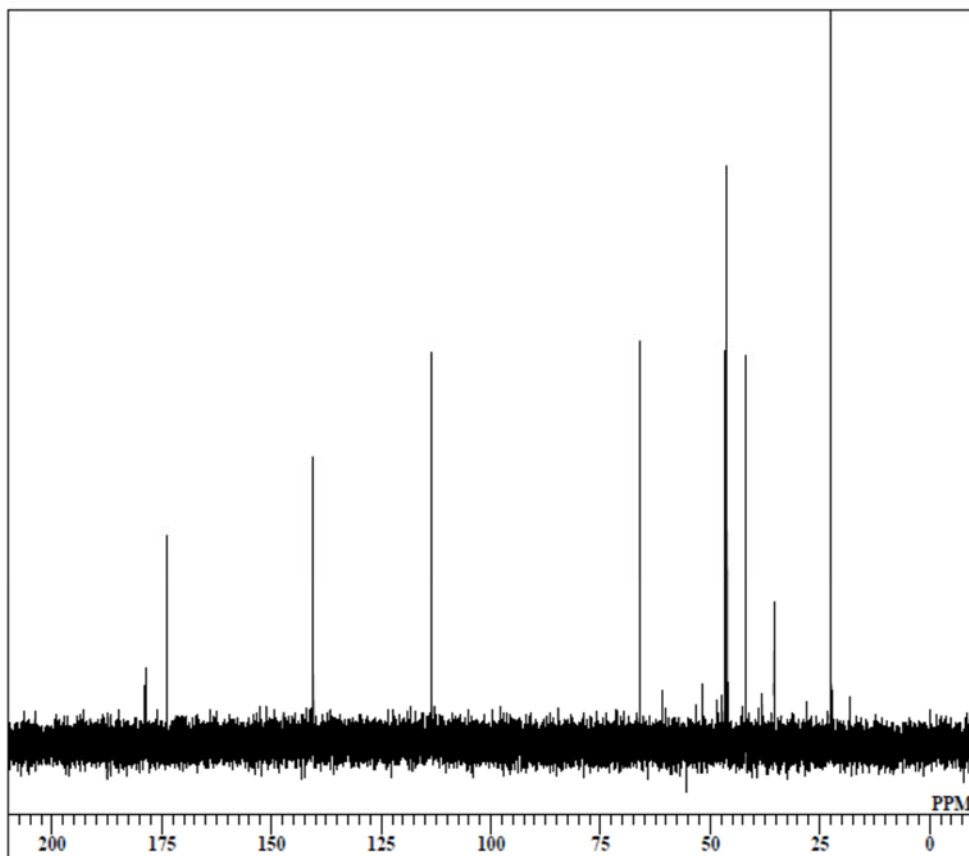

DFILE 39-21-4-C.als  
 COMNT 39-21-4-C  
 DATIM Sun Oct 09 10:05:07 2016  
 OBNUC 13C  
 EXMOD BCM  
 OBFRQ 100.40 MHz  
 OBSET 125.00 KHz  
 OBFIN 10500.00 Hz  
 POINT 32768  
 FREQU 27118.64 Hz  
 SCANS 2919  
 ACQTM 1.2083 sec  
 PD 1.7920 sec  
 PW1 4.40 usec  
 IRNUC 1H  
 CTEMP 22.0 c  
 SLVNT D2O  
 EXREF 0.00 ppm  
 BF 0.10 Hz  
 RGAIN 31

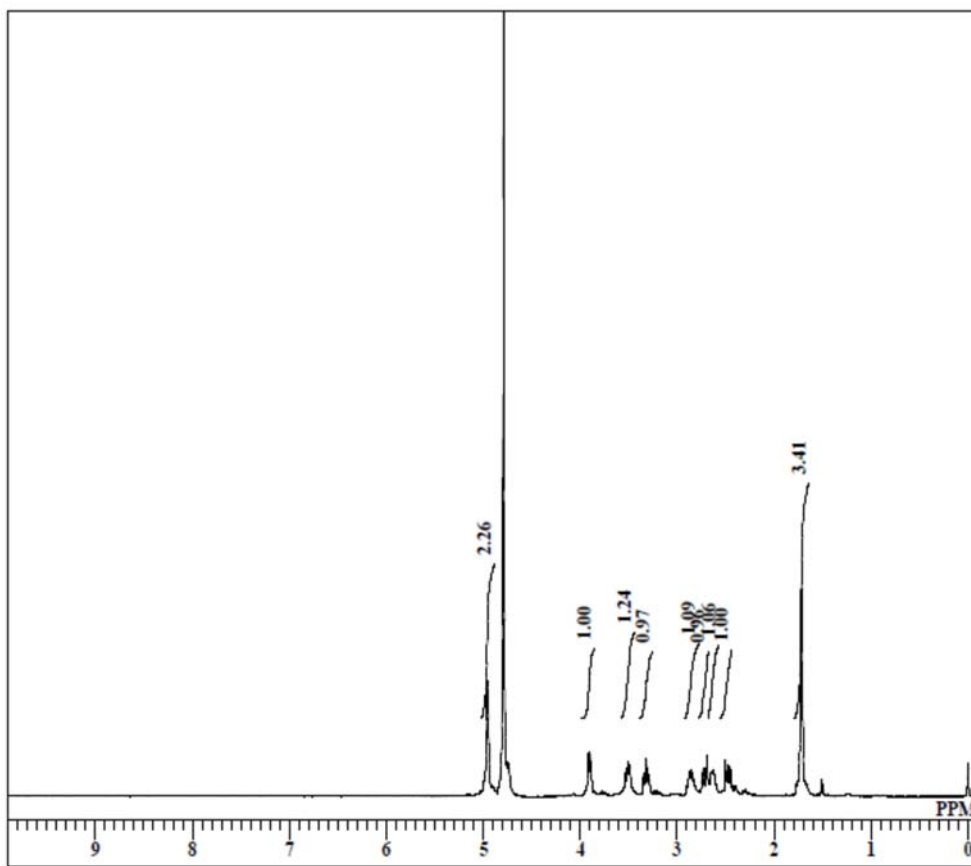

DFILE 39-19-4.als  
 COMNT 39-19-3  
 DATIM Thu Oct 06 18:27:02 2016  
 OBNUC 1H  
 EXMOD NON  
 OBFREQ 399.65 MHz  
 OBSET 134.40 KHz  
 OBFIN 64.90 Hz  
 POINT 16384  
 FREQU 7992.01 Hz  
 SCANS 8  
 ACQTM 2.0500 sec  
 PD 4.9500 sec  
 PW1 12.10 usec  
 IRNUC 1H  
 CTEMP 22.2 c  
 SLVNT D2O  
 EXREF 0.00 ppm  
 BF 0.10 Hz  
 RGAIN 18

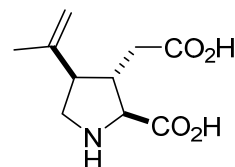

2

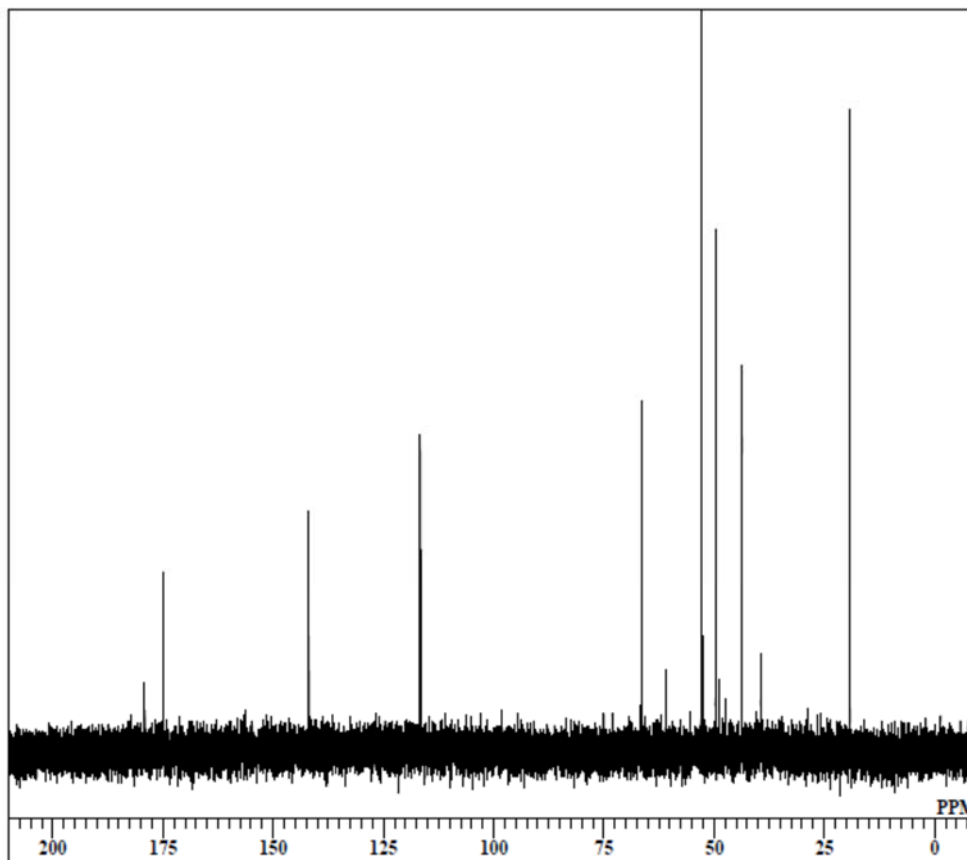

DFILE 39-19-4-C.als  
 COMNT 39-19-4-C  
 DATIM Sat Oct 08 09:14:38 2016  
 OBNUC 13C  
 EXMOD BCM  
 OBFREQ 100.40 MHz  
 OBSET 125.00 KHz  
 OBFIN 10500.00 Hz  
 POINT 32768  
 FREQU 27118.64 Hz  
 SCANS 2868  
 ACQTM 1.2083 sec  
 PD 1.7920 sec  
 PW1 4.40 usec  
 IRNUC 1H  
 CTEMP 22.3 c  
 SLVNT D2O  
 EXREF 0.00 ppm  
 BF 0.10 Hz  
 RGAIN 31

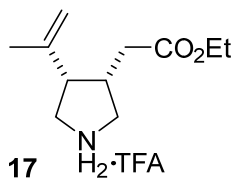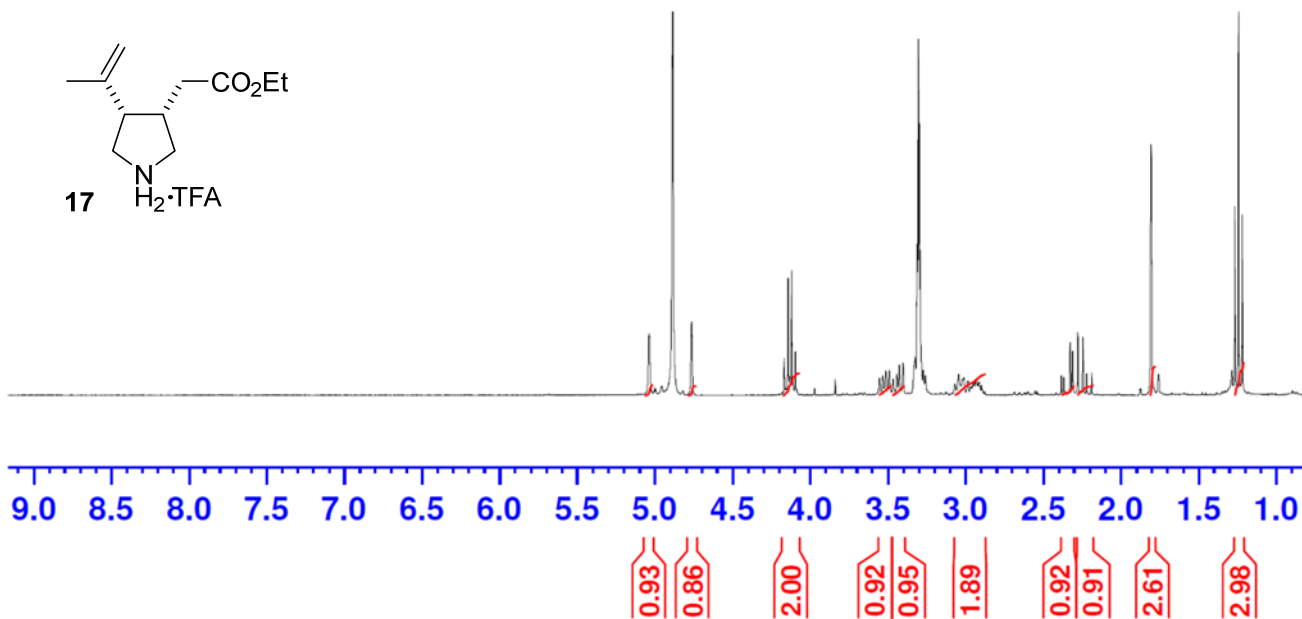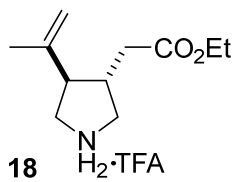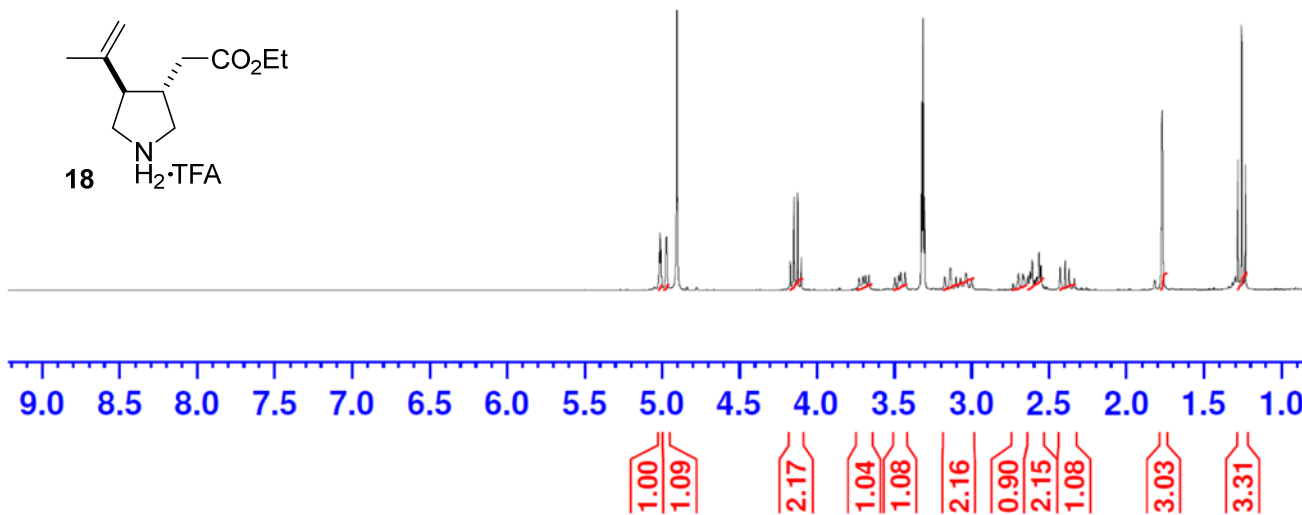

Supplement: c7ob01427a1.pdf [file c7ob01427a1.pdf]
